# Supplementary material for: CuWO4 as a photocatalyst for room temperature aerobic benzylamine oxidation
Source: Royal Society of Chemistry journal article supplement (doi:10.1039/c7cc07611h), 2018-01-01
Supplement: c7cc07611h1.pdf [file c7cc07611h1.pdf]

Electronic Supplementary Information  
**CuWO<sub>4</sub> as a Photocatalyst for Room Temperature Aerobic Benzylamine Oxidation**

Aaron D. Proctor, Shobhana Panuganti, Bart M. Bartlett\*

*Department of Chemistry, University of Michigan, 930 North University Avenue, Ann Arbor, Michigan,  
48109-1055, United States*

Table of Contents

|                                                                                                                                                                               |    |
|-------------------------------------------------------------------------------------------------------------------------------------------------------------------------------|----|
| Materials and Methods.....                                                                                                                                                    | S1 |
| Catalyst Preparation .....                                                                                                                                                    | S1 |
| Photocatalytic Reactions .....                                                                                                                                                | S1 |
| Materials Characterization .....                                                                                                                                              | S2 |
| Catalyst Recyclability and Metal Leaching .....                                                                                                                               | S2 |
| <b>Figure S1.</b> Pictures of custom-built photoreactor.....                                                                                                                  | S3 |
| <b>Figure S2.</b> Decrease in concentration of benzylamine over time for the photochemical oxidation of benzylamine on CuWO <sub>4</sub> and BiVO <sub>4</sub> .....          | S3 |
| <b>Table S1.</b> Calculated benzylamine concentrations from GC-FID analysis of aliquots of the photochemical oxidation of benzylamine on CuWO <sub>4</sub> .....              | S3 |
| <b>Table S2.</b> Calculated benzylamine concentrations from GC-FID analysis of aliquots of the photochemical oxidation of benzylamine on BiVO <sub>4</sub> .....              | S4 |
| <b>Figure S3.</b> Representative GC-FID traces used to calculate the rate of benzylamine oxidation .....                                                                      | S4 |
| <b>Figure S4.</b> Linear fit of first order rate plots for the photochemical oxidation of benzylamine on CuWO <sub>4</sub> and BiVO <sub>4</sub> ....                         | S4 |
| <b>Figure S5.</b> UV-vis diffuse reflectance spectra of as synthesized CuWO <sub>4</sub> and BiVO <sub>4</sub> .....                                                          | S5 |
| <b>Figure S6.</b> GC-FID traces of the photochemical oxidation of <i>N</i> -benzylidenebenzylamine on CuWO <sub>4</sub> and BiVO <sub>4</sub> .....                           | S5 |
| <b>Table S3.</b> Calculated concentrations of benzylamine and <i>N</i> -benzylidenebenzylamine by <sup>1</sup> H NMR after photochemical oxidation on CuWO <sub>4</sub> ..... | S5 |
| <b>Table S4.</b> Calculated concentrations of benzylamine and <i>N</i> -benzylidenebenzylamine by <sup>1</sup> H NMR after photochemical oxidation on BiVO <sub>4</sub> ..... | S5 |
| <b>Figure S7.</b> Example <sup>1</sup> H NMR spectra of the photochemical oxidation of benzylamine on CuWO <sub>4</sub> at >90% conversion..                                  | S6 |
| <b>Figure S8.</b> XRD diffractograms of as synthesized and post photolysis CuWO <sub>4</sub> and BiVO <sub>4</sub> .....                                                      | S6 |
| <b>Figure S9.</b> IR spectra of as synthesized and post photolysis CuWO <sub>4</sub> and BiVO <sub>4</sub> .....                                                              | S7 |
| <b>Table S5.</b> ICP-MS detection of leached metal after successive benzylamine oxidation reactions.....                                                                      | S7 |

## Materials and Methods

Benzylamine (99%), *N*-benzylidenebenzylamine (99%), chlorobenzene (99+%, for spectroscopy), copper (II) oxide, tungsten oxide, and bismuth nitrate pentahydrate were purchased from Sigma-Aldrich. Acetonitrile (Certified ACS), dichloromethane (Certified ACS), ethanol (200 proof), and ammonium metavanadate were purchased from Fisher. Acetonitrile- $d_3$  was purchased from Cambridge Isotope Laboratories. Benzylamine was vacuumed distilled over NaOH and stored on sieves under  $N_2$ . All other reagents were used as received. Nylon syringe filters (25 mm, 0.2  $\mu$ m membrane) were purchased from VWR or Macherey-Nagel.

## Catalyst Preparation

Copper tungstate was synthesized by grinding a 1:1 mole ratio of copper (II) oxide (0.51 g) and tungsten oxide (1.49 g) in a mortar and pestle for 15 minutes followed by heating in a muffle furnace at 800 °C for 6 hours. The oven temperature ramped up to and down from 800 °C at a rate of 10 °C • min<sup>-1</sup>. Bismuth vanadate was synthesized by grinding a 1:1 mole ratio of ammonium metavanadate (0.500 g) and bismuth (III) nitrate pentahydrate (2.07 g) for 15 minutes. This was heated in a muffle furnace at 500 °C for 6 hours. The oven temperature ramped up to and down from 500 °C at a rate of 10 °C • min<sup>-1</sup>. Both CuWO<sub>4</sub> and BiVO<sub>4</sub> were placed in a 12 mL polypropylene centrifuge with 7 mL of Milli-Q (18.2 M $\Omega$ •cm<sup>-1</sup>) water and vortexed for about 30 seconds before centrifuging at 3500 rpm for 5 minutes. The water was then decanted and the process was repeated twice more. The powder was then washed three times with ethanol before drying overnight in a vacuum oven at 60 °C.

## Photocatalytic Reactions

All photocatalytic reactions were carried out in a custom-built aluminum LED assembly (Figure S1). Royal blue LEDs ( $\lambda_{max}$  = 460 nm) with a power rating of 1.03 W were purchased from Mouser Electronics (Mouser Part#: 997-LXML-PR02-A900). Reactions contained 20 mg of catalyst, 2 mL of substrate solution, and were run in 4 mL dram vials that had their flat bottoms visible to the LEDs while receiving a power density of 200 mW • cm<sup>-2</sup>. Reactions were capped with rubber septa, kept under O<sub>2</sub> using a balloon, and stirred for an hour in the dark before having an aliquot taken out to determine the initial concentration of benzylamine in each solution (procedure for making GC samples is described below). The reactions were then illuminated. For reactions run under N<sub>2</sub>, the solutions had N<sub>2</sub> bubbled through them during the one hour of stirring in the dark. They were then run under an N<sub>2</sub> atmosphere for the rest of the experiment. A concentration of 250 mM benzylamine was used as the starting concentration of benzylamine for kinetics and selectivity experiments. Aliquots of 10  $\mu$ L were taken out for each time point (every 12 hours for 60 hours) of the kinetics experiments. These were added to a GC vial that contained 990  $\mu$ L of a 1.01 mM solution of chlorobenzene in acetonitrile. Conversion data for three reactions were collected and averaged for each catalyst. Reactions were analyzed by gas chromatography with a flame ionization detector. These were then converted to first order rate plots. GC-FID analysis was conducted on a Trace 1310 GC-FID system with a TG-5MS Amine column. Argon was used as the carrier gas. The heating method used for analysis was to ramp from 40 °C to 300 °C at a rate of 10 °C • min<sup>-1</sup> and hold at 300 °C for 10 minutes before cooling. Before NMR analysis each reaction was filtered through a nylon syringe filter to remove the catalyst. A volume of 500  $\mu$ L of the filtered reaction solution was added to an NMR tube that contained 100  $\mu$ L of a 0.6 M dichloromethane internal standard solution in acetonitrile- $d_3$ . Selectivity data for four reactions was collected and averaged for each catalyst. The concentration of *N*-BB was calculated using both the imine and benzylic protons and averaged. <sup>1</sup>H NMR data was collected on a Varian MR400

NMR spectrometer equipped with a Varian 5 mm PFG AutoX Dual Broadband probe. All NMR data was processed in MestReNova software.

### Materials Characterization

The post-photolysis powders were washed with acetonitrile by adding the powder and 7 mL of acetonitrile to a 12 mL polypropylene centrifuge tube and vortexing for about 30 seconds before centrifuging at 3500 rpm for 5 minutes. This was decanted and repeated twice more. The powders were then dried in a vacuum oven at 60 °C overnight. Powder x-ray diffraction data were collected on a Panalytical Empyrean diffractometer at a power of 1.8 kW (45 kV, 40 ma) with Cu K $\alpha$  ( $\lambda$  = 1.5418 nm) radiation. The detector was a X'Celerator Scientific, a position sensitive 1D detector equipped with Bragg-Brentano<sup>HD</sup> x-ray optic delivering only K $\alpha$  radiation. Patterns were collected with a sampling step of 0.020 and a scan rate of 0.080° • s<sup>-1</sup> while spinning at a rate of 0.25 Hz. A Zeiss LEO 1455VP scanning electron microscope at an accelerating voltage of 10 kV and working distance of 5 mm was used for imaging the catalysts. SEM samples were sputter-coated with gold with a Cressington 108auto sputter coater for eight seconds prior to imaging. BET surface areas of the catalysts were obtained using nitrogen adsorption measurements on a Quantachrome NOVA4200e. A Varian Cary 5000 spectrophotometer equipped with an external diffuse reflectance accessory was used for UV-vis measurements. Spectra were collected in reflectance mode and transformed into absorbance using the Kubelka-Monk function. Barium sulfate was used as a 100% reflectance standard. Infrared spectroscopy was conducted using a Thermo Scientific Nicolet iS50 FT-IR with an ATR attachment.

### Catalyst Recyclability and Metal Leaching

Multiple photochemical oxidations of benzylamine were done with the same batch of catalyst to determine recyclability of both CuWO<sub>4</sub> and BiVO<sub>4</sub>. Dissolved metal content in each successive reaction solution was also determined. The method used for carrying out these photocatalytic reactions is identical to that described above. Each reaction was illuminated for 24 hours. After this illumination time, the reactions were centrifuged for 10 minutes at 2500 rpm and 500  $\mu$ L was removed. This was filtered through a nylon syringe filter and diluted with aqueous HNO<sub>3</sub> / 0.01% TritonX-100 to give a solution 0.5% in reaction solution by volume. This was used for ICP-MS analysis of the dissolved metal content in the post-photolysis solution. All ICP-MS measurements were conducted on a PerkinElmer NexION 2000 ICP-MS instrument. The conversion of benzylamine in each reaction was determined with GC as it was with the kinetics experiments described above. The reaction then had the majority of the remaining solution removed with a pipet, being careful to not remove any catalyst. A volume of 2 mL of acetonitrile was added to the dram vial. This was stirred for 5 minutes in the dark before being centrifuged. The solution was again removed, and a new volume of acetonitrile was added. This washing procedure was repeated four times. The catalyst was then put in a vacuum oven at 50 °C to dry overnight. This catalyst was then used in further photochemical oxidation reactions of benzylamine. Four trials of five successive reactions were conducted for each catalyst.

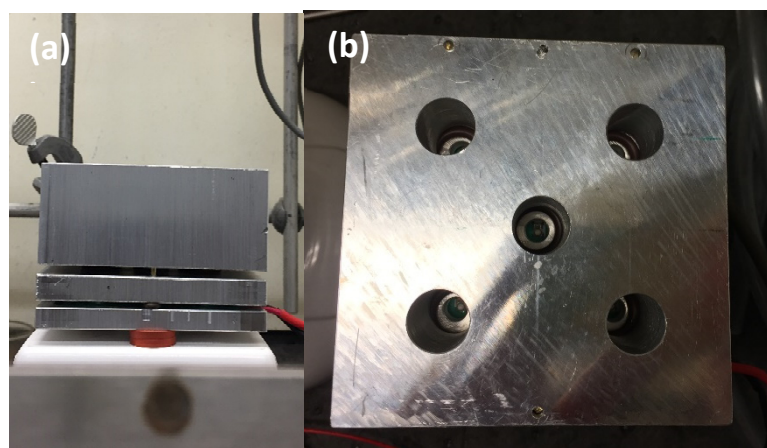

**Figure S1:** Custom-built blue LED setup. View from (a) side-on and (b) top-down.

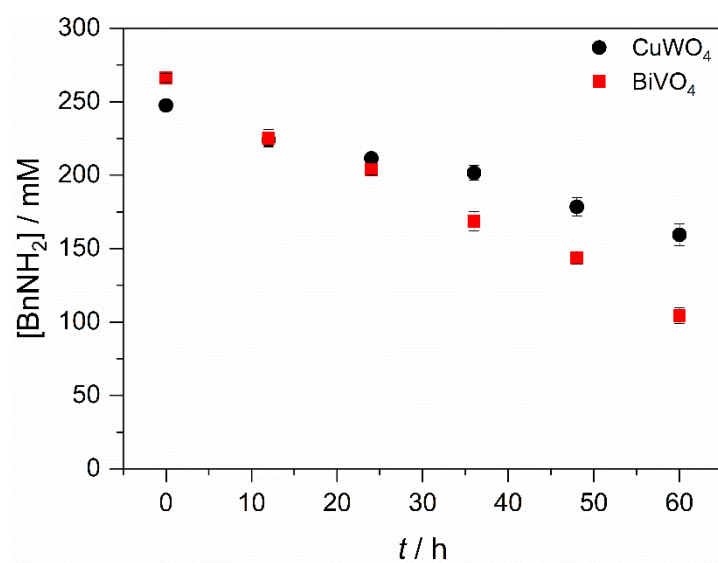

**Figure S2:** Decrease in benzylamine concentration over the course of the photochemical oxidation on CuWO<sub>4</sub> (black circles) and BiVO<sub>4</sub> (red squares).

**Table S1:** Values calculated for the decrease in benzylamine concentration over time during the photocatalytic oxidation on CuWO<sub>4</sub>.

| Time (h) | Trial 1 [BnNH <sub>2</sub> ] (mM) | Trial 2 [BnNH <sub>2</sub> ] (mM) | Trial 3 [BnNH <sub>2</sub> ] (mM) |
|----------|-----------------------------------|-----------------------------------|-----------------------------------|
| 0        | 248                               | 245                               | 249                               |
| 12       | 225                               | 218                               | 229                               |
| 24       | 209                               | 211                               | 213                               |
| 36       | 207                               | 195                               | 203                               |
| 48       | 173                               | 174                               | 187                               |
| 60       | 166                               | 149                               | 164                               |

**Table S2:** Values calculated for the decrease in benzylamine concentration over time during the photocatalytic oxidation on BiVO<sub>4</sub>.

| Time (h) | Trial 1 [BnNH <sub>2</sub> ] (mM) | Trial 2 [BnNH <sub>2</sub> ] (mM) | Trial 3 [BnNH <sub>2</sub> ] (mM) |
|----------|-----------------------------------|-----------------------------------|-----------------------------------|
| 0        | 263                               | 265                               | 270                               |
| 12       | 230                               | 217                               | 229                               |
| 24       | 207                               | 206                               | 198                               |
| 36       | 164                               | 178                               | 163                               |
| 48       | 146                               | 147                               | 138                               |
| 60       | 104                               | 111                               | 98                                |

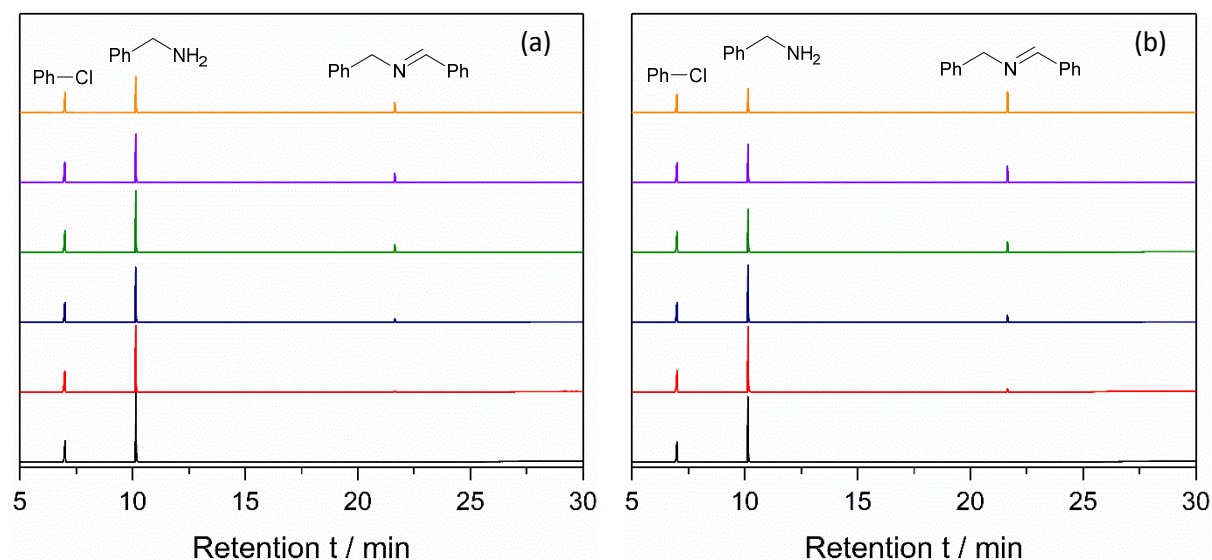

**Figure S3:** GC-FID traces of the photochemical oxidation of benzylamine on (a) CuWO<sub>4</sub> and (b) BiVO<sub>4</sub> at times 0 h (black), 12 h (red), 24 h (navy), 36 h (green), 48 h (violet), and 60 h (orange).

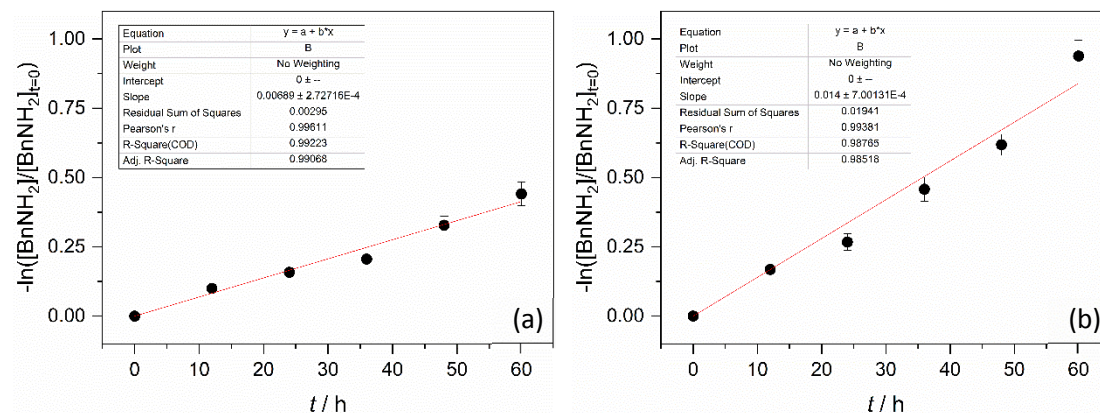

**Figure S4:** Linear fits for the rate constants obtained from the photochemical oxidation of benzylamine on (a) CuWO<sub>4</sub> and (b) BiVO<sub>4</sub>.

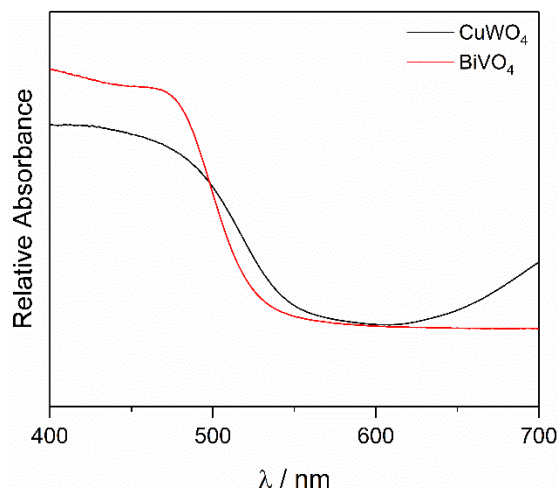

**Figure S5:** Diffuse reflectance spectra of as synthesized  $\text{CuWO}_4$  (black) and  $\text{BiVO}_4$  (red).

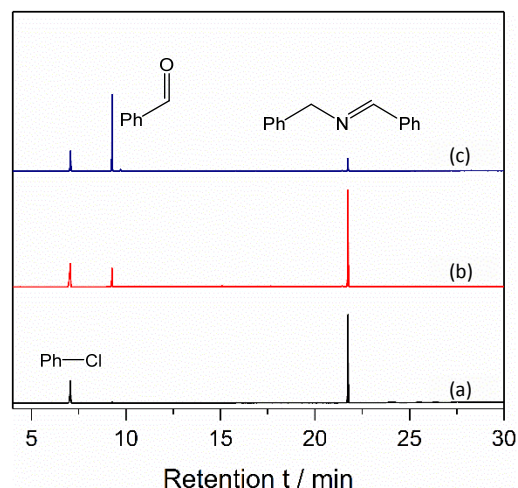

**Figure S6:** Oxidation of *N*-BB to BnAld. GC-FID trace of (a) 5 mM *N*-BB in acetonitrile (b) post-photolysis solution of reaction containing  $\text{CuWO}_4$  and (c) post-photolysis solution of reaction containing  $\text{BiVO}_4$ . Reaction conditions: 20 mg of catalyst, 2 mL of 5 mM *N*-BB in acetonitrile, blue LED,  $\text{O}_2$  atmosphere, 24 h.

**Table S3:** Determined concentrations of  $\text{BnNH}_2$  and *N*-BB by  $^1\text{H}$  NMR after photochemical oxidation on  $\text{BiVO}_4$ . The *N*-BB concentration was calculated using both the benzylic protons and imine proton. An internal standard of 1 M dichloromethane was used.

| Concentration                         | Trial 1 | Trial 2 | Trial 3 | Trial 4 |
|---------------------------------------|---------|---------|---------|---------|
| $\text{BnNH}_2$ (mM)                  | 28      | 26      | 22      | 33      |
| <i>N</i> -BB <sub>benzylic</sub> (mM) | 114     | 116     | 123     | 120     |
| <i>N</i> -BB <sub>imine</sub> (mM)    | 115     | 118     | 123     | 121     |

**Table S4:** Determined concentrations of  $\text{BnNH}_2$  and *N*-BB by  $^1\text{H}$  NMR after photochemical oxidation on  $\text{CuWO}_4$ . The *N*-BB concentration was calculated using both the benzylic protons and imine proton. An internal standard of 1 M dichloromethane was used.

| Concentration                         | Trial 1 | Trial 2 | Trial 3 | Trial 4 |
|---------------------------------------|---------|---------|---------|---------|
| $\text{BnNH}_2$ (mM)                  | 35      | 18      | 16      | 30      |
| <i>N</i> -BB <sub>benzylic</sub> (mM) | 97      | 106     | 105     | 102     |
| <i>N</i> -BB <sub>imine</sub> (mM)    | 96      | 106     | 108     | 104     |

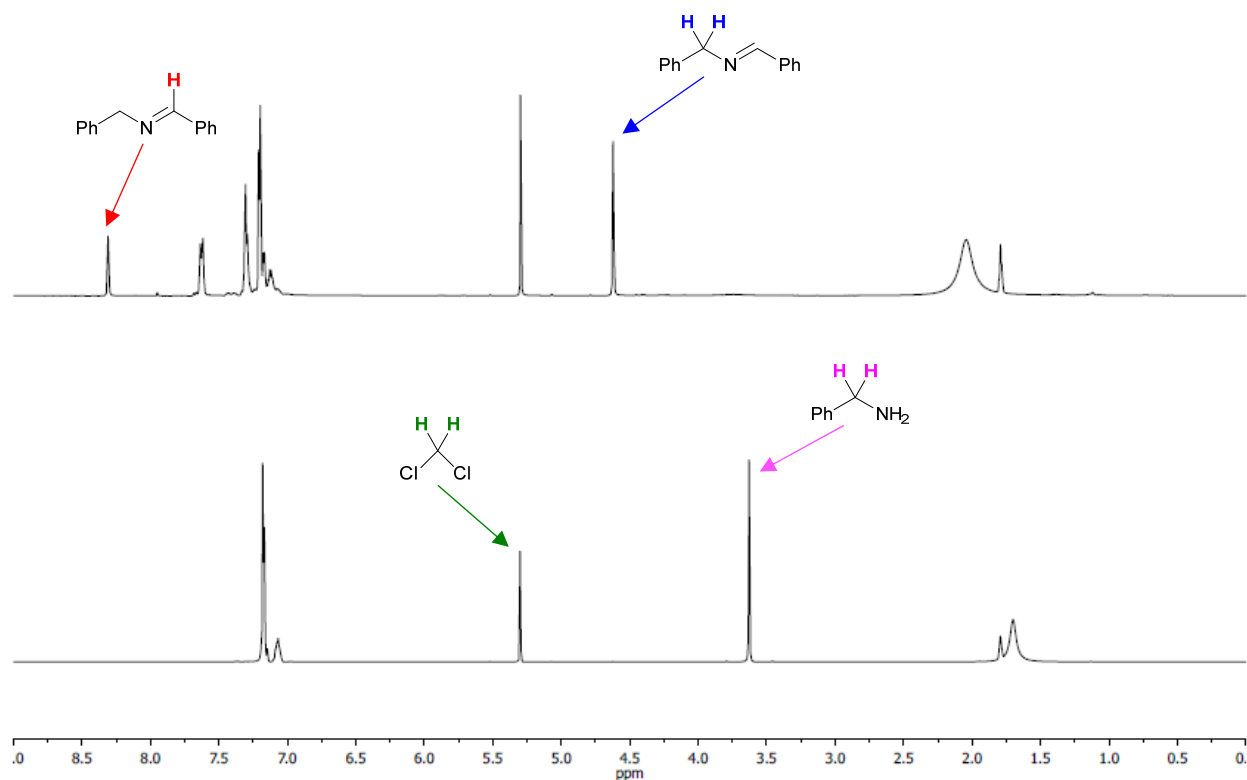

**Figure S7:**  $^1\text{H}$  NMR spectra of 250 mM benzylamine solution pre-photolysis (bottom) and the reaction solution after 93% conversion of the benzylamine has been achieved after photochemical oxidation by  $\text{CuWO}_4$  (top).

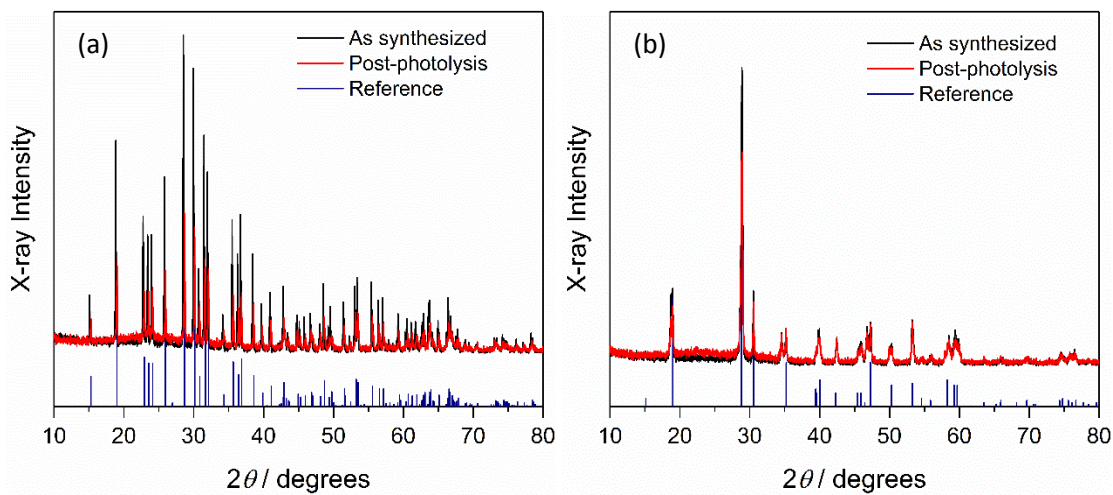

**Figure S8:** XRD diffractograms of (a)  $\text{CuWO}_4$  and (b)  $\text{BiVO}_4$ . Patterns were obtained for the as synthesized powders (black) and for the catalyst collected after benzylamine oxidation (red). Reference patterns (navy) included are ICSD#24339 for  $\text{CuWO}_4$  and ICSD#31550 for  $\text{BiVO}_4$ .



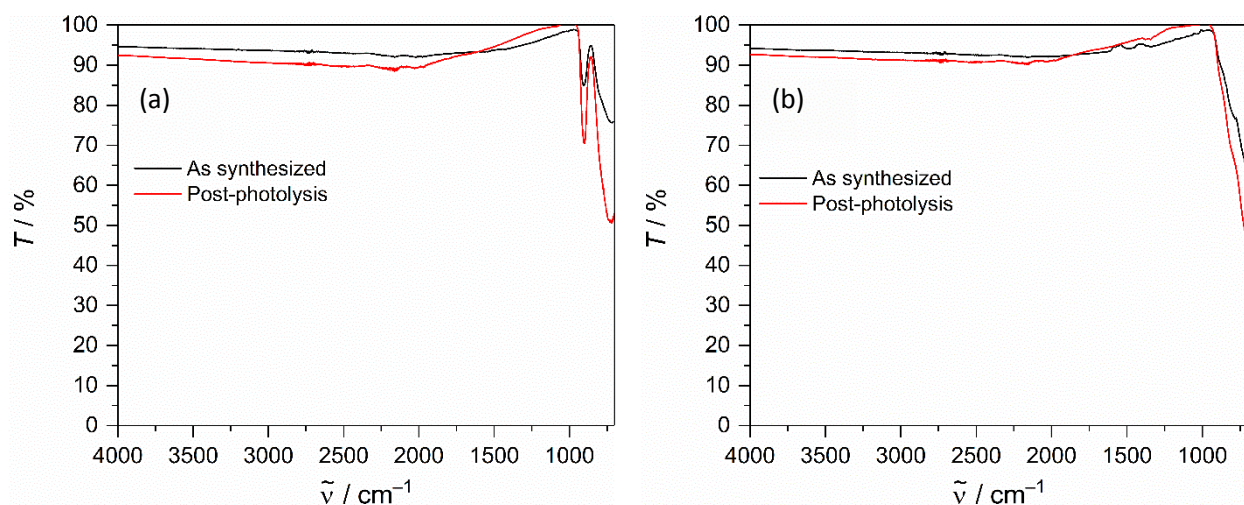

**Figure S9:** IR spectra of (a)  $\text{CuWO}_4$  and (b)  $\text{BiVO}_4$ . Spectra were collected for the as synthesized powders (black) and for the catalyst collected after benzylamine oxidation (red).

**Table S5:** The percent of the total quantity of catalyst detected as dissolved metal detected by ICP-MS measurements of post-photolysis solutions of successive photochemical oxidations of  $\text{BnNH}_2$  to  $N$ -BB with the same batch of catalyst.

| Catalyst        | Metal | Reaction Number (% of Total Catalyst Detected as Dissolved Metal) |      |      |      |      |
|-----------------|-------|-------------------------------------------------------------------|------|------|------|------|
|                 |       | 1                                                                 | 2    | 3    | 4    | 5    |
| $\text{CuWO}_4$ | Cu    | 0.02                                                              | 0.02 | 0.02 | 0.01 | 0.02 |
|                 | W     | 0                                                                 | 0    | 0    | 0    | 0    |
| $\text{BiVO}_4$ | Bi    | 0                                                                 | 0    | 0    | 0    | 0    |
|                 | V     | 0.01                                                              | 0.01 | 0.01 | 0.01 | 0.01 |
